# Supplementary material
Source: PubMed Central journal article supplement (PMC5546027)
Supplement: 10.1074_M117.785030_jbc.M117.785030-1.pdf [file 10.1074_M117.785030_jbc.M117.785030-1.pdf]

## Supplementary Materials:

### Supplementary Figure 1.

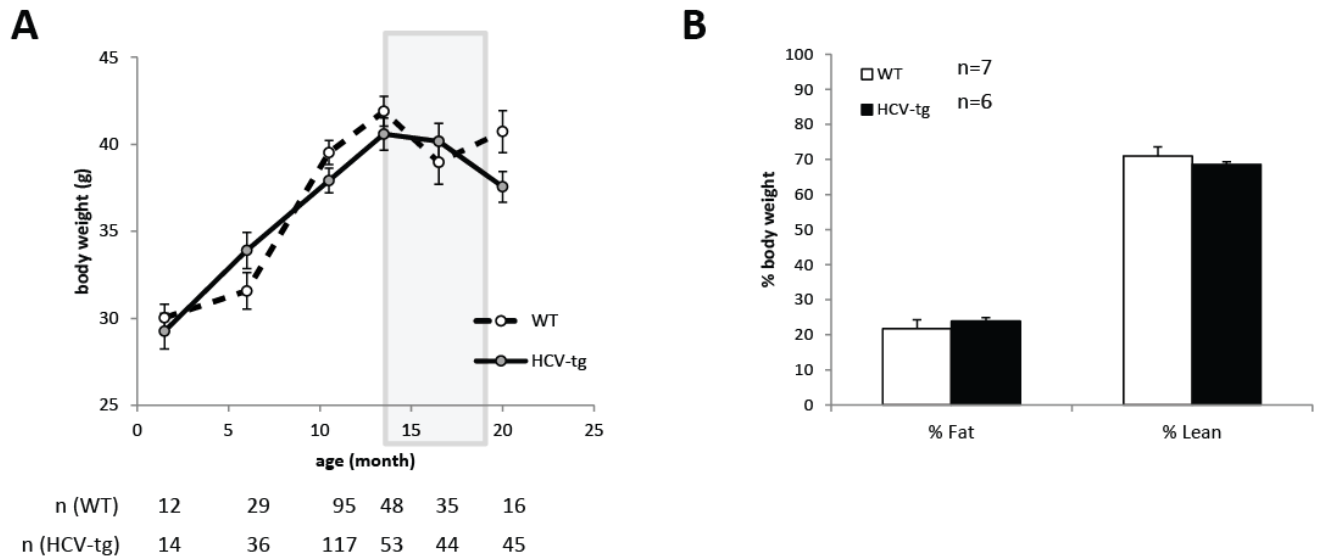

**Supplementary Figure 1.** (A) Body weight at different ages in HCV-tg mice and age-matched WT littermates. The grey box represents the age range of mice included in this study. (B) Respective proportions of whole-body lean and fat tissues in 14 to 18 months old mice measured by means of tomography scanner and expressed as percentage of total body weight.

**Supplementary Table 1.** PCR primers and probes:

| Target | Assay ID      | Gene accession number | Length of amplicon (bp) |
|--------|---------------|-----------------------|-------------------------|
| G6pc   | Mm00839363_m1 | NM_008061.3           | 116                     |
| Gck    | Mm00439129_m1 | NM_010292.4           | 69                      |
| Irs2   | Mm03038438_m1 | NM_001081212.1        | 63                      |
| Pck1   | Mm00440632_g1 | NM_011044.2           | 77                      |
| Pfkfb3 | Mm00504650_m1 | NM_001177752.1        | 98                      |
| Socs3  | Mm01249143_g1 | NM_007707.3           | 113                     |

Supplementary Table 2. Antibodies

| Target                | Antibody name and clone                           | Supplier                       |
|-----------------------|---------------------------------------------------|--------------------------------|
| 14.3.3                | 14-3-3 ζ Antibody (C-16)                          | Santa Cruz Biotechnology, INC. |
| Akt (Pan)             | Akt (pan) (C67E7) Rabbit mAb                      | Cell Signaling Technology      |
| Akt-P(Ser473)         | Phospho-Akt (Ser473) (D9E) Rabbit mAb             | Cell Signaling Technology      |
| CD95                  | Monoclonal Antibody CD95 (Human Fas) (7C11)       | Immunotech                     |
| FoxO1                 | FKHR (C-9)                                        | Santa Cruz Biotechnology, INC. |
| FoxO1-P(Ser256)       | p-FKHR (Ser 256) Sc-101681                        | Santa Cruz Biotechnology, INC. |
| Glut2                 | Glut2 (C-19)                                      | Santa Cruz Biotechnology, INC. |
| GK                    | Glucokinase (clone 849520)                        | R&D Systems                    |
| GSK3 alpha/beta       | GSK-3 alpha/beta Rabbit mAb (D75D3)               | Cell Signaling Technology      |
| GSK3α (/β)-P(Ser21/9) | Phospho (Ser21/9)-GSK-3 alpha (/beta) (37F11)     | Cell Signaling Technology      |
| HA tag                | HA tag (BMG-3F10), Rat monoclonal                 | Sigma-Aldrich (Roche)          |
| HCV core              | Clone 27G5G5                                      | Gift from Dr. G. Inchauspé     |
| IRS-2                 | IRS-2 Antibody (L1326)                            | Cell Signaling Technology      |
| p70-S6K               | p70 S6 Kinase (49D7) Rabbit mAb                   | Cell Signaling Technology      |
| p70-S6K-P(Thr389)     | Phospho-p70 S6 Kinase (Thr389) (108D2) Rabbit mAb | Cell Signaling Technology      |
| PDK1                  | PDK1 Antibody (#3062)                             | Cell Signaling Technology      |
| PDK1-P(Ser241)        | Phospho-PDK1 (Ser241) Antibody (#3061)            | Cell Signaling Technology      |
| PEPCK-C               | PEPCK-C (P14)                                     | Santa Cruz Biotechnology, INC. |
| PKCE                  | PKC epsilon (C-15)                                | Santa Cruz Biotechnology, INC. |
| PKCE-P(Ser728)        | p-PKC epsilon (Ser 729) (sc-12355)                | Santa Cruz Biotechnology, INC. |
| SOCS3                 | SOCS3 (L210) Antibody                             | Cell Signaling Technology      |
| γTubulin              | gamma-Tubulin, Clone GTU-88                       | Sigma-Aldrich                  |
